# Supplementary material
Source: PubMed Central journal article supplement (PMC5218819)
Supplement: NIHMS774649-supplement-01.pdf [file NIHMS774649-supplement-01.pdf]

**Only Supplementary Material**

Table A : Comparison of characteristics between participants included in the present analyses and those excluded

|                                  |                 | Participants not<br>included, n=2697 | Participants<br>included, n=4246 |
|----------------------------------|-----------------|--------------------------------------|----------------------------------|
|                                  |                 | N, (% or m±SD)*                      | N, (% or m±SD)*                  |
| <b>Socio-demographic factors</b> |                 |                                      |                                  |
| Age (y)                          |                 | 2696, (61.8±6.1)                     | 4246, (60.9±5.9)                 |
| Sex                              | Men             | 1700, (63.0)                         | 3178, (74.9)                     |
| Ethnicity                        | White           | 2335, (88.7)                         | 4037, (95.1)                     |
|                                  | South Asian     | 173, (6.6)                           | 158, (3.7)                       |
|                                  | Black           | 124, (4.7)                           | 51, (1.2)                        |
| Socio-economic position          | Low             | 426, (16.4)                          | 334, (7.9)                       |
|                                  | Mid             | 1214, (46.7)                         | 1763, (41.5)                     |
|                                  | High            | 960, (36.9)                          | 2149, (50.6)                     |
| Marital Status                   | Living alone    | 771, (28.6)                          | 941, (22.2)                      |
| <b>Health behavior factors</b>   |                 |                                      |                                  |
| Smoking habits                   | Never smokers   | 1269, (47.4)                         | 2132, (50.2)                     |
|                                  | Ex smokers      | 1129, (42.2)                         | 1816, (42.8)                     |
|                                  | Current smokers | 279, (10.4)                          | 298, (7.0)                       |
| Alcohol consumption              | No consumption  | 579, (23.1)                          | 592, (13.9)                      |
|                                  | Moderate Intake | 1413, (56.5)                         | 2681, (63.1)                     |
|                                  | Heavy drinker   | 511, (20.4)                          | 973, (22.9)                      |
| Physical activity                | Inactive        | 772, (30.6)                          | 977, (23)                        |

|                                         |                   |                  |                   |
|-----------------------------------------|-------------------|------------------|-------------------|
|                                         | Moderately Active | 474, (18.8)      | 699, (16.5)       |
|                                         | Active            | 1281, (50.7)     | 2570, (60.5)      |
| Total energy intake                     | (kcal/d)          | 1434, (2096±679) | 4246, (2195±646)  |
| <b>Health status factors</b>            |                   |                  |                   |
| Type 2 diabetes                         | Yes               | 344, (12.8)      | 364, (8.6)        |
| Central obesity (yes)                   | Yes               | 820, (37.5)      | 1186, (27.9)      |
| Cardiovascular Diseases                 | Yes               | 313, (11.6)      | 352, (8.3)        |
| Hypertension                            | Yes               | 1146, (48.6)     | 1528, (36.0)      |
| HDL cholesterol                         | (mmol/L)          | 2093, (1.6±0.5)  | 4246, (1.6±0.4)   |
| Use of lipid-lowering drugs             | Yes               | 354, (13.1)      | 472, (11.1)       |
| Cognitive impairment                    | Yes               | 402, (20.0)      | 507, (11.9)       |
| <b>Dietary Inflammatory Index score</b> | (points)          | 1434, (0.15±1.4) | 4246, (-0.02±1.3) |
| <b>Recurrent Depressive Symptoms</b>    | <b>Yes</b>        | 179, (17.7)      | 265, (6.2)        |

---

Table B : characteristics of 4246 Whitehall II participants according to Dietary Inflammatory score

| Characteristic at phase7        |                   | Dietary Inflammatory Score |       |
|---------------------------------|-------------------|----------------------------|-------|
|                                 |                   | r or m $\pm$ SD*           | P     |
| <b>Sociodemographic factors</b> |                   |                            |       |
| Age                             | year              | -0.05                      | 0.002 |
| Sex                             | Men               | -0.03 $\pm$ 1.3            | 0.62  |
|                                 | Women             | -0.002 $\pm$ 1.4           |       |
| Ethnicity                       | White             | -0.03 $\pm$ 1.3            | 0.01  |
|                                 | South Asian       | 0.30 $\pm$ 1.4             |       |
|                                 | Black             | -0.18 $\pm$ 1.7            |       |
| Socio-economic position         | Low               | 0.18 $\pm$ 1.4             | <.001 |
|                                 | Mid               | 0.08 $\pm$ 1.4             |       |
|                                 | High              | -0.13 $\pm$ 1.3            |       |
| Marital Status                  | Married           | -0.05 $\pm$ 1.3            | 0.01  |
|                                 | Living alone      | 0.08 $\pm$ 1.4             |       |
| <b>Health behavior factors</b>  |                   |                            |       |
| Smoking habits                  | Never smoker      | -0.05 $\pm$ 1.3            | <.001 |
|                                 | Ex smoker         | -0.08 $\pm$ 1.3            |       |
|                                 | Current smoker    | 0.52 $\pm$ 1.5             |       |
| Alcohol consumption             | No consumption    | 0.10 $\pm$ 1.4             | 0.01  |
|                                 | Moderate Intake   | -0.01 $\pm$ 1.3            |       |
|                                 | Heavy drinker     | -0.11 $\pm$ 1.3            |       |
| Physical activity               | Inactive          | 0.19 $\pm$ 1.3             | <.001 |
|                                 | Moderately Active | 0.10 $\pm$ 1.4             |       |

|                              |                   |              |       |
|------------------------------|-------------------|--------------|-------|
|                              | Active            | -0.13 ± 1.3  |       |
| Total energy intake          | kcal/d            | -0.056       | <.001 |
| <b>Health status factors</b> |                   |              |       |
| Type 2 diabetes              | No                | -0.02 ± 1.3  | 0.41  |
|                              | Yes               | -0.07 ± 1.3  |       |
| Central obesity              | No                | -0.03 ± 1.3  | 0.45  |
|                              | Yes               | 0.01 ± 1.4   |       |
| History of CAD               | No                | -0.01 ± 1.3  | 0.08  |
|                              | Yes               | -0.14 ± 1.4  |       |
| Hypertension                 | No                | -0.01 ± 1.3  | 0.35  |
|                              | Yes               | -0.05 ± 1.3  |       |
| HDL cholesterol              | mmol/L            | -0.04        | 0.004 |
| Use of lipid-lowering drugs  | No                | 0.0001 ± 1.3 | 0.005 |
|                              | Yes               | -0.18 ± 1.3  | 0.24  |
| Cognitive impairment         | No                | -0.03 ± 1.3  |       |
|                              | Yes               | 0.04 ± 1.4   |       |
| Plasma IL-6 levels †         | Tertile 1 n=1250  | -0.12 ± 1.3  | 0.006 |
|                              | Tertile 2 n=1249  | 0.002 ± 1.3  |       |
|                              | Tertile 3 n=1257  | 0.04 ± 1.3   |       |
| Plasma CRP levels†           | Tertile 1 n= 1333 | -0.13 ± 1.3  | 0.002 |
|                              | Tertile 2 n= 1332 | 0.02 ± 1.3   |       |
|                              | Tertile 3 n= 1337 | 0.03 ± 1.3   |       |

---

\* Means of dietary inflammatory index score according to characteristics of participants were compared using the Student T-test and ANOVA for categorized variables and correlation coefficients were computed for quantitative variables.

†Medians and the range for each tertile of IL-6 (in pg/mL )were 1.10 (0.23- 1.38) for Tertile 1; 1.68 (1.39-2.07) for Tertile 2 and 2.86 (2.08-25) for Tertile 3.

Medians and the range for each tertile of CRP (in mg/L ) were 0.45 (0.08- 0.74) for Tertile 1; 1.11 (0.74- 1.68)for Tertile 2 and 2.97 (1.69-9.98) for Tertile 3.

We excluded participants with missing values on inflammatory markers and possible cases of acute inflammation and immune activation due to current illness (defined as having CRP values>10 pg/mL)

Table C : Association between dietary inflammatory Index (DII) score and recurrent depressive symptoms over 5 years after taking into account inflammatory markers

| Dietary Inflammatory Index |                         | Men n=2848         |      | Women n=901        |       |
|----------------------------|-------------------------|--------------------|------|--------------------|-------|
|                            |                         | OR (95% CI)        | P    | OR (95% CI)        | P     |
| <b>Model 1</b>             |                         |                    |      |                    |       |
| z-score                    | (per 1SD of DII score ) | 1.11 (0.90 - 1.37) | 0.33 | 1.65 (1.26 - 2.15) | <.001 |
| Tertiles                   | Tertile 1               | 1 (reference)      |      | 1 (reference)      |       |
|                            | Tertile 2               | 0.98 (0.64 - 1.51) | 0.93 | 1.70 (0.88 - 3.26) | 0.11  |
|                            | Tertile 3               | 1.08 (0.67 - 1.74) | 0.76 | 3.03 (1.53 - 6.01) | 0.002 |
| <b>Model 2</b>             |                         |                    |      |                    |       |
| z-score                    | (per 1SD of DII score ) | 1.03 (0.88 - 1.21) | 0.71 | 1.39 (1.12 - 1.71) | 0.003 |
| Tertiles                   | Tertile 1               | 1 (reference)      |      | 1 (reference)      |       |
|                            | Tertile 2               | 0.98 (0.64 - 1.50) | 0.91 | 1.61 (0.83 - 3.14) | 0.16  |
|                            | Tertile 3               | 0.96 (0.59 - 1.56) | 0.87 | 2.72 (1.39 - 5.55) | 0.006 |
| <b>Model 3</b>             |                         |                    |      |                    |       |
| z-score                    | (per 1SD of DII score ) | 1.06 (0.86 - 1.31) | 0.60 | 1.53 (1.15 - 2.03) | 0.003 |
| Tertiles                   | Tertile 1               | 1 (reference)      |      | 1 (reference)      |       |
|                            | Tertile 2               | 1.02 (0.66 - 1.57) | 0.94 | 1.51 (0.77 - 2.98) | 0.24  |
|                            | Tertile 3               | 0.98 (0.60 - 1.60) | 0.94 | 2.60 (1.27 - 5.36) | 0.009 |

Model 1 was adjusted for age, sex, ethnicity, total energy intake, levels of plasma IL-6 and CRP at phase 7.

Model 2 was adjusted as for model 1 and for SES, living alone, smoking, physical activity, and alcohol consumption impairment assessed at phase 7.

Model 3 was adjusted as for model 2 and cardiovascular disease, type 2 diabetes, hypertension, HDL cholesterol, use of lipid-lowering drugs, central obesity, and cognitive impairment assessed at phase 7. DepS, depressive symptom

In these analyses, we excluded participants with missing values on inflammatory markers and possible cases of acute inflammation and immune activation due to current illness (defined as having CRP values >10 pg/mL)
